# Supplementary material for: IκBζ facilitates protective immunity against Salmonella infection via Th1 differentiation and IgG production
Source: PubMed Central journal article supplement (PMC6557891; doi:10.1038/s41598-019-44019-3), 2019-06-10
Supplement: 41598_2019_44019_MOESM1_ESM.pdf [file 41598_2019_44019_MOESM1_ESM.pdf]

**I $\kappa$ B $\zeta$  facilitates protective immunity against *Salmonella* infection via Th1  
differentiation and IgG production**

Jae-Hee Ahn<sup>1</sup>, Jaewon Cho<sup>1</sup>, Bo-Eun Kwon<sup>1</sup>, Geun-Shik Lee<sup>2</sup>, Sung-il Yoon<sup>3</sup>, Seung Goo Kang<sup>3</sup>, Pyeung-Hyeun Kim<sup>4</sup>, Mi-Na Kweon<sup>5</sup>, Hyungjun Yang<sup>6</sup>, Bruce A Vallance<sup>6</sup>, Young-In Kim<sup>7</sup>, Sun-Young Chang<sup>7</sup>, Hyun-Jeong Ko<sup>1</sup>

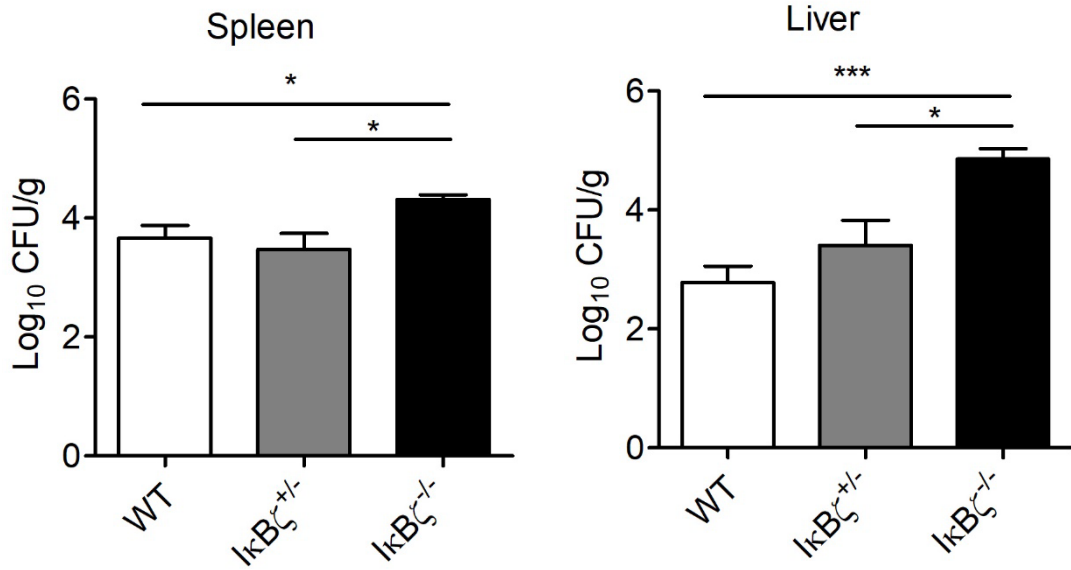

Supplementary Figure 1

Colony forming units of *Salmonella* UK-1 strain were counted with tissue homogenates obtained from liver and spleen at 9 days after oral infection of  $10^7$  CFU/mouse. Tissue homogenates was applied onto XLD agar plate and incubated about 24 hours. \* $P < 0.05$  and \*\*\* $P < 0.001$  based on unpaired t-test.

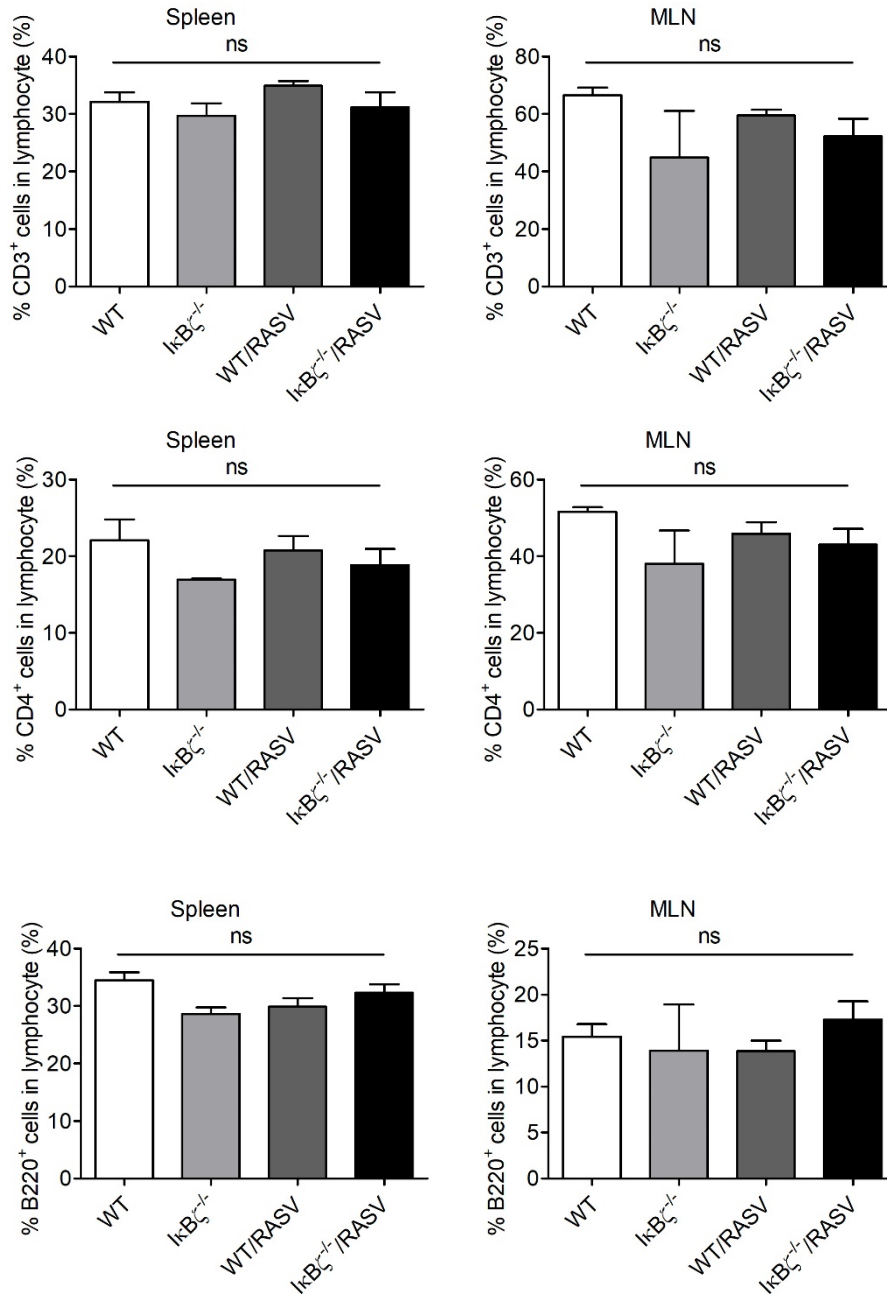

Supplementary Figure 2

CD3<sup>+</sup>, CD4<sup>+</sup> and B220<sup>+</sup> cells from spleen and lymph nodes were analyzed through flow cytometry. Spleen and mesenteric lymph nodes (MLN) were obtained after two-times administration of RASV with 14 days interval. ns, not significant; based on ANOVA with Bonferroni's multiple comparison test.

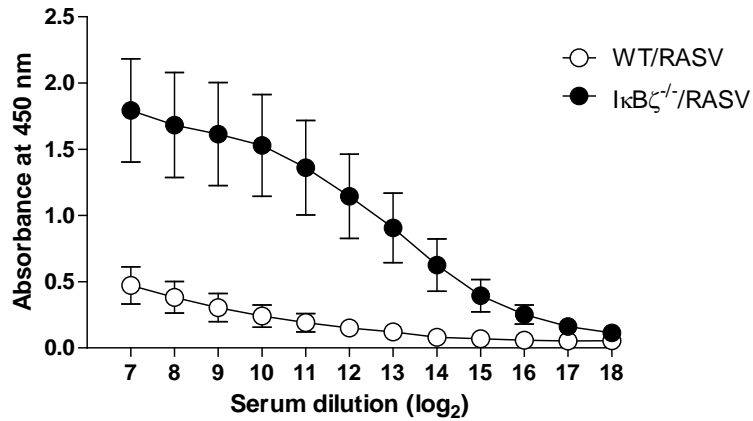

### Supplementary Figure 3

Levels of *Salmonella*-specific IgG were evaluated by ELISA using whole cells of RASV as an antigen. Sera were obtained from groups of mice after two-times immunizations with RASV. For quantification of RASV-specific antibody in mouse serum,  $10^7$  CFU/well of RASV-whole cell bacteria were coated onto 96 well plate overnight. Further step was proceeded as described in method. Sera were next diluted by two-fold starting from 1:200 dilution.

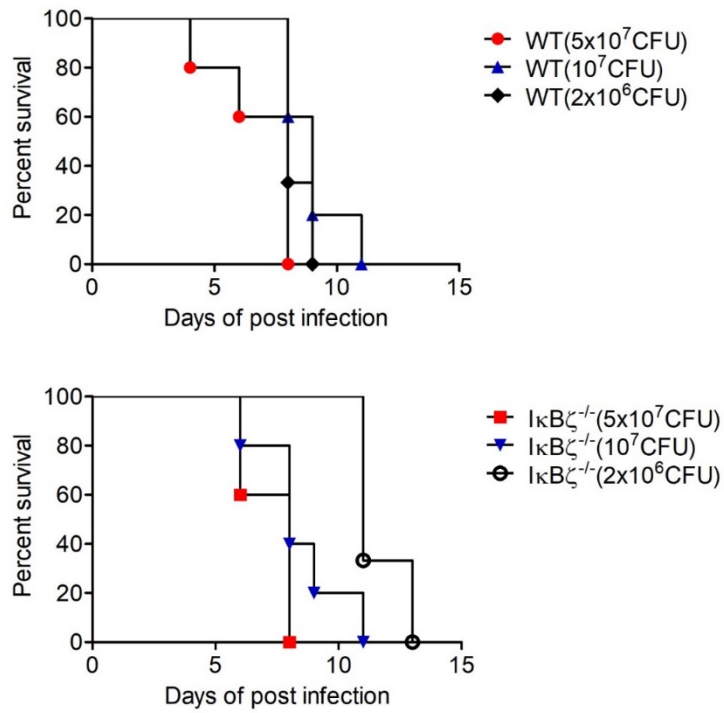

Supplementary Figure 4

Wild-type (WT) and  $I\kappa B\zeta^{-/-}$  mice were orally challenged with  $2 \times 10^6$ ,  $10^7$ , and  $5 \times 10^7$  CFU of a lethal wild-type *Salmonella* strain (UK-1) per mouse.

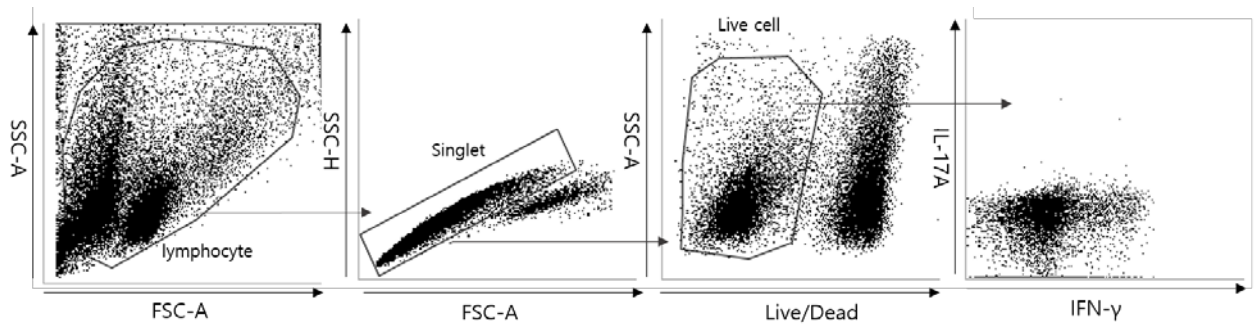

Supplementary Figure 5

Gating strategy to characterize interferon- $\gamma$  and IL-17A producing cells differentiated by 10 ng/ml of IL-12.

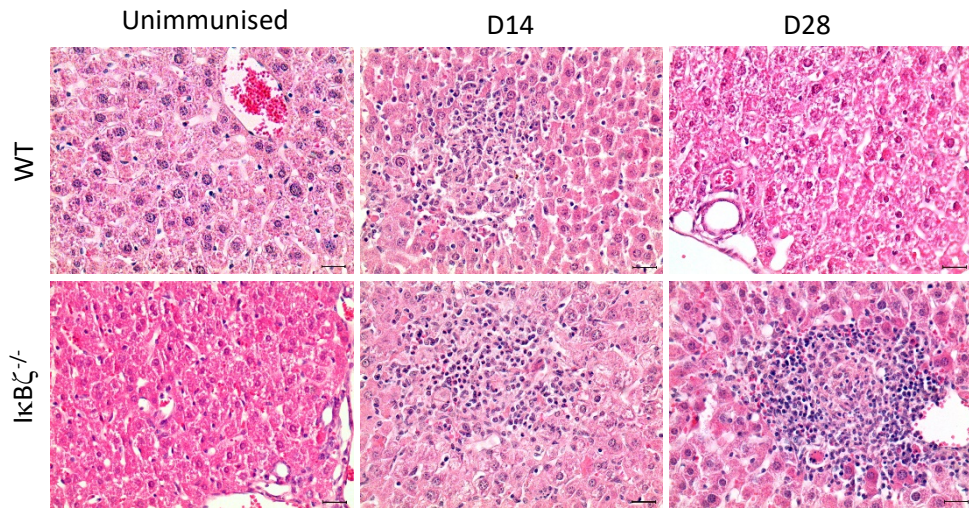

Supplementary Figure 6

High-magnified pictures of Figure 2C. Scale bar is 25 $\mu$ m.

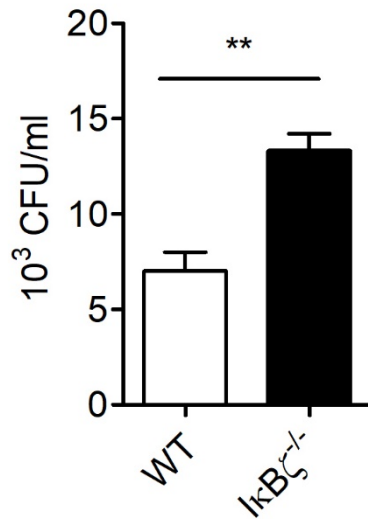

Supplementary Figure 7

Bone marrow derived macrophages ( $1 \times 10^5$  cells/ well) from WT and *IκBζ*<sup>-/-</sup> mice were co-cultured with 10 MOI of live UK-1 for 4 hours, and then lysed with PBS containing 1% Triton X-100. *Salmonella* CFU was checked by plating serial dilutions onto XLD agar plates.



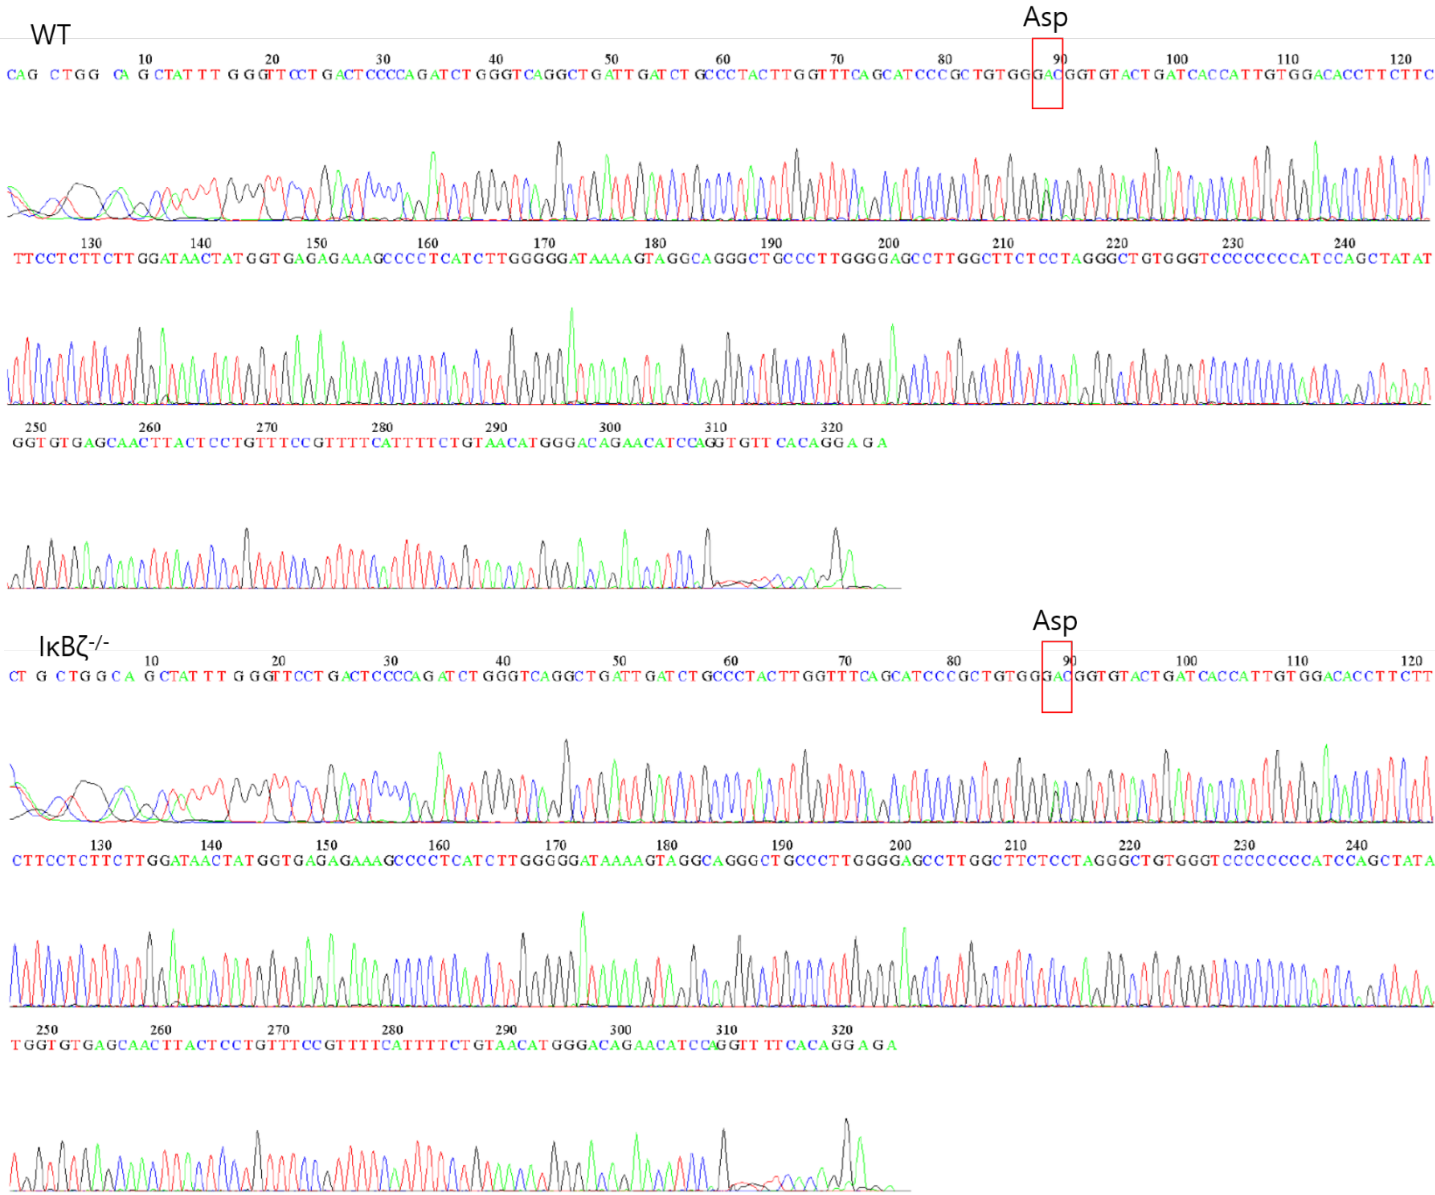

Supplementary Figure 8

The genetic status of *Nramp1* was analyzed by genomic DNA sequencing. Tail DNA isolated from WT and *IkB $\zeta$ <sup>-/-</sup>* mice were analyzed using the following primers; Forward 5'-TTC AAC ACA ACC CAC ACT CC-3', Reverse 5'-CCT GTG ACA CCT GGA TGT TCT-3'.
